# Supplementary material
Source: PubMed Central journal article supplement (PMC2441645)
Supplement: NIHMS55272-supplement-SI.pdf [file NIHMS55272-supplement-SI.pdf]

**Site-specific synthesis of oligonucleotides containing malondialdehyde adducts of deoxyguanosine  
and deoxyadenosine via a post-synthetic modification strategy**

*Hao Wang, Ivan D. Kozekov, Alben Kozekova, Pamela Tamura, Lawrence J. Marnett, Thomas M.*

*Harris and Carmelo J. Rizzo\**

Departments of Chemistry and Biochemistry, Center in Molecular Toxicology and Vanderbilt Institute  
of Chemical Biology, Vanderbilt University, VU Station B 351822, Nashville TN 37235-1822

\* To whom correspondence should be addressed: Department of Chemistry, Vanderbilt University, VU  
Station B 351822, Nashville, TN 37235-1822. Phone: 615-322-6100, FAX: 615-343-1234. e-mail:  
c.j.rizzo@vanderbilt.edu

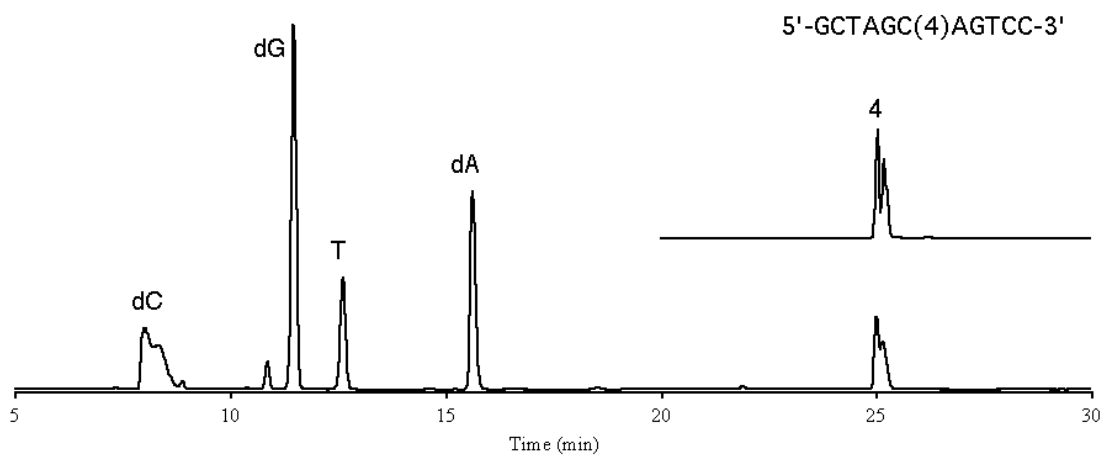

**Figure S1.** Enzyme digest of oligonucleotide 7.

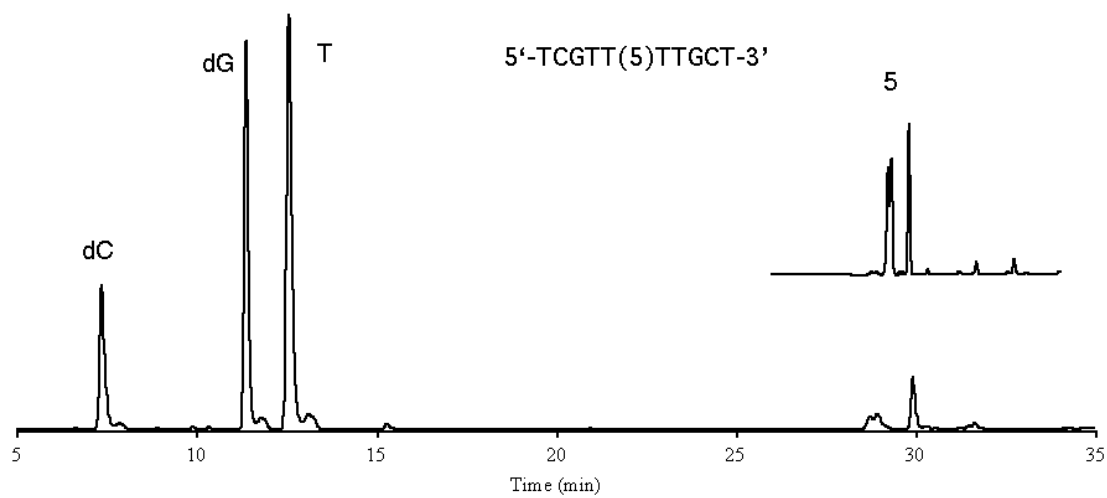

**Figure S2.** Enzyme digest of oligonucleotide 11.

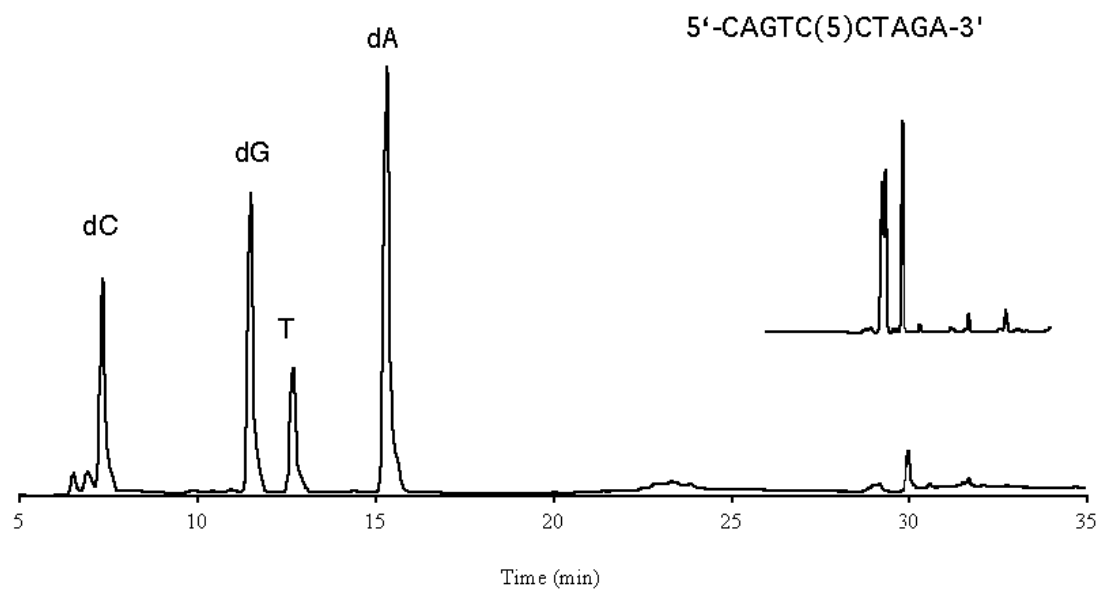

**Figure S3.** Enzyme digest of oligonucleotide 5'-CAGTC(5)CTAGA.

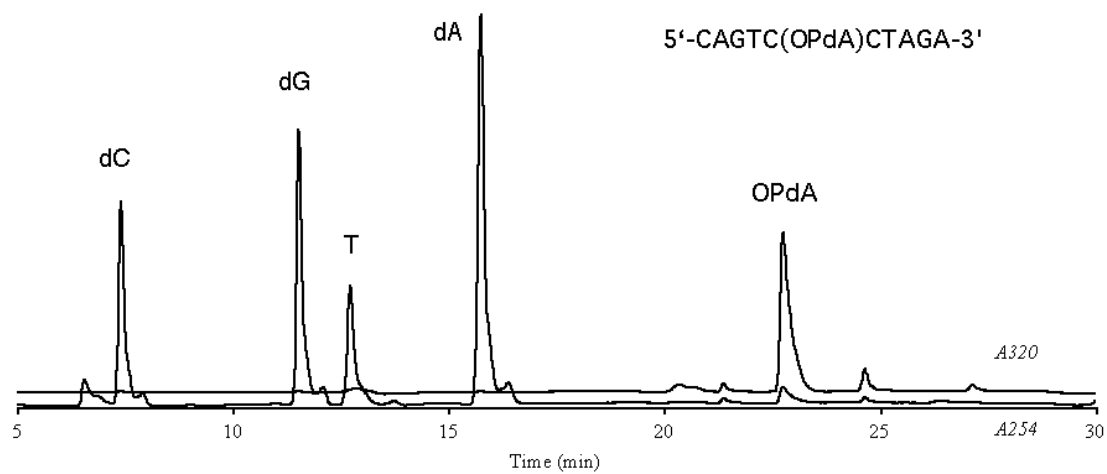

**Figure S4.** Enzyme digest of oligonucleotide **13**.

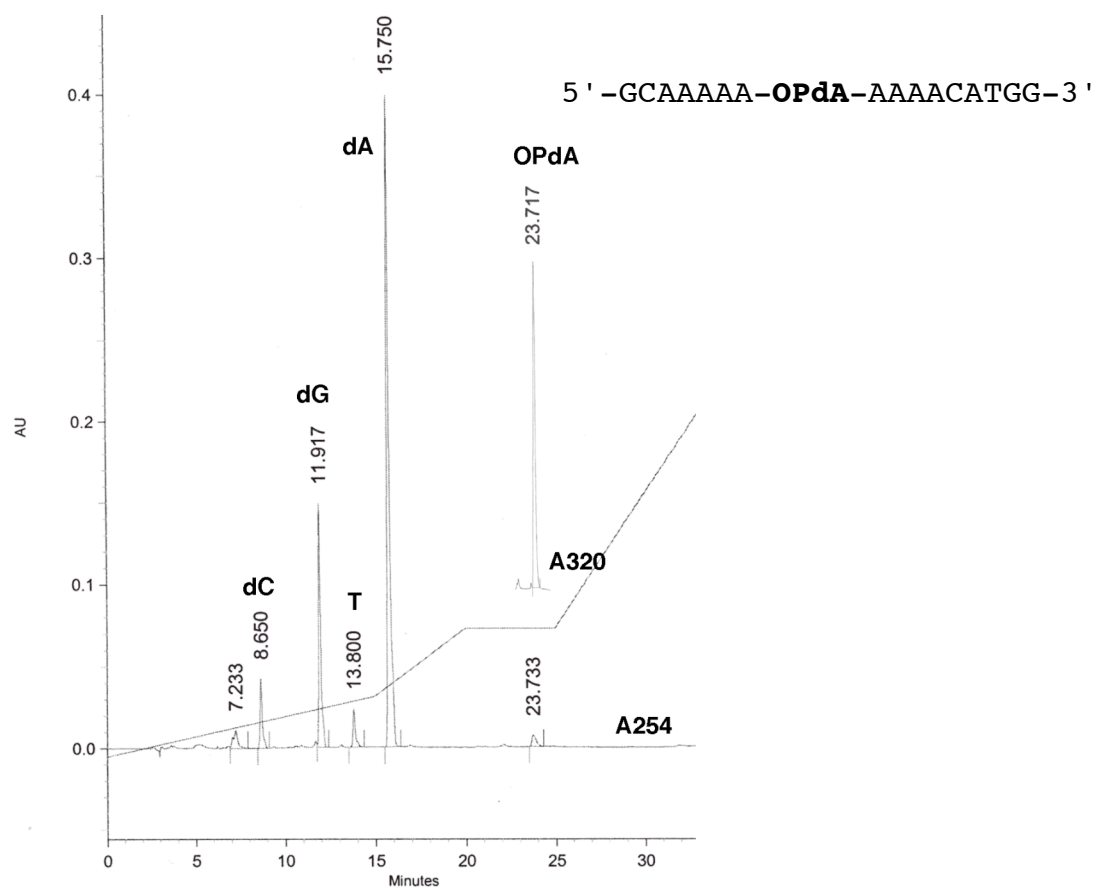

**Figure S5.** Enzyme digest of oligonucleotide **15** (5'-GCAAAAA-OPdA-AAAACATGG-3').

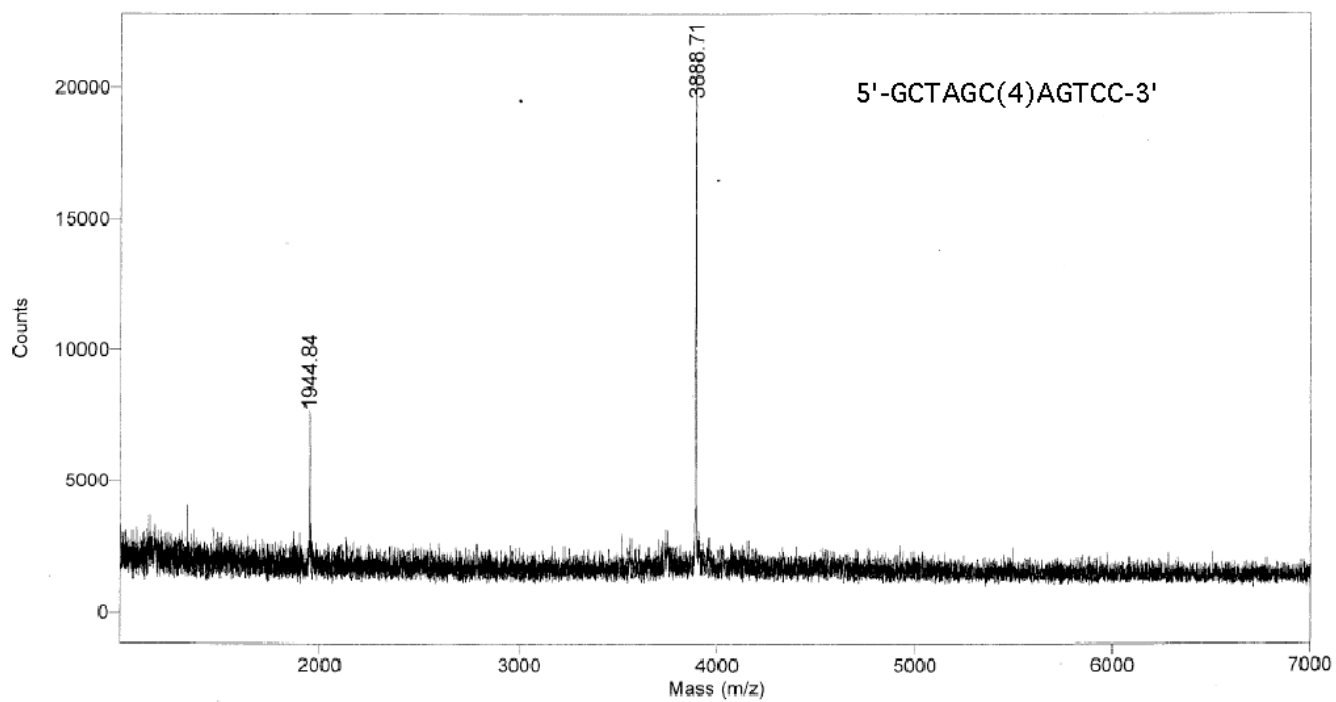

**Figure S6.** MALDI-TOF Mass spectrum of oligonucleotide **7**.

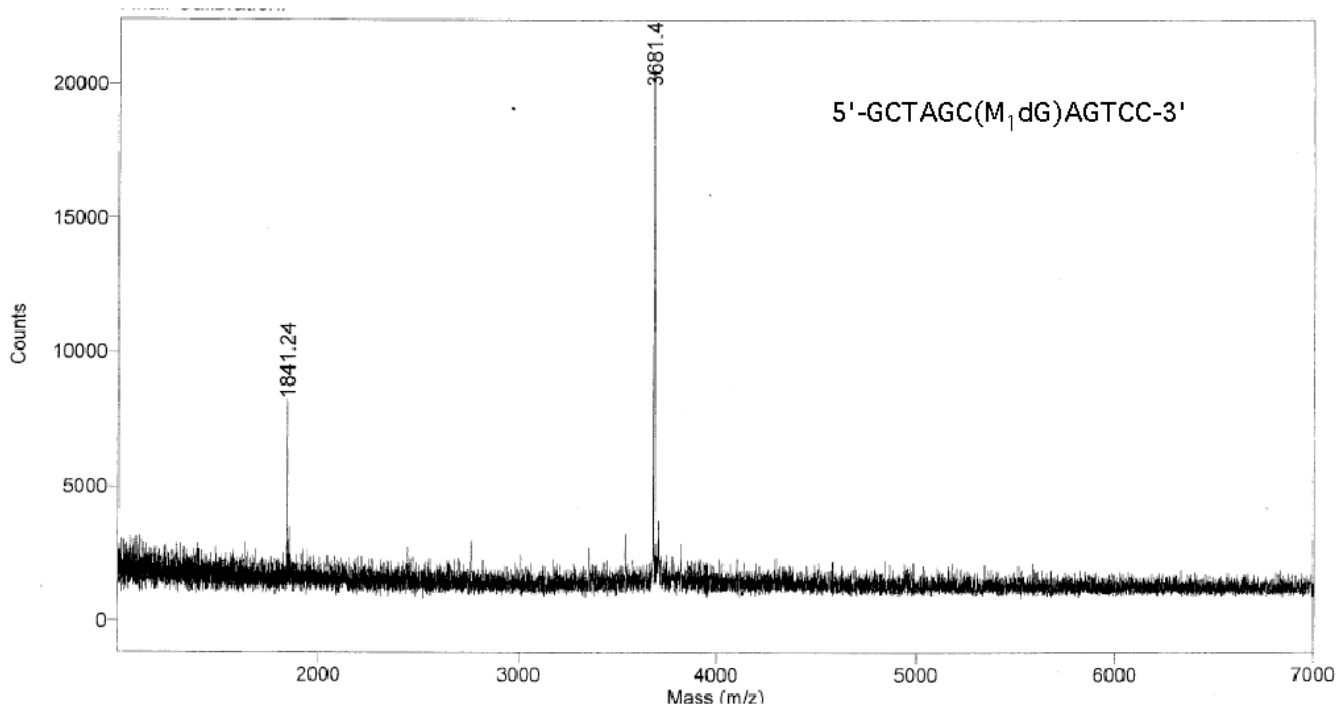

**Figure S7.** MALDI-TOF Mass spectrum of oligonucleotide **9**.

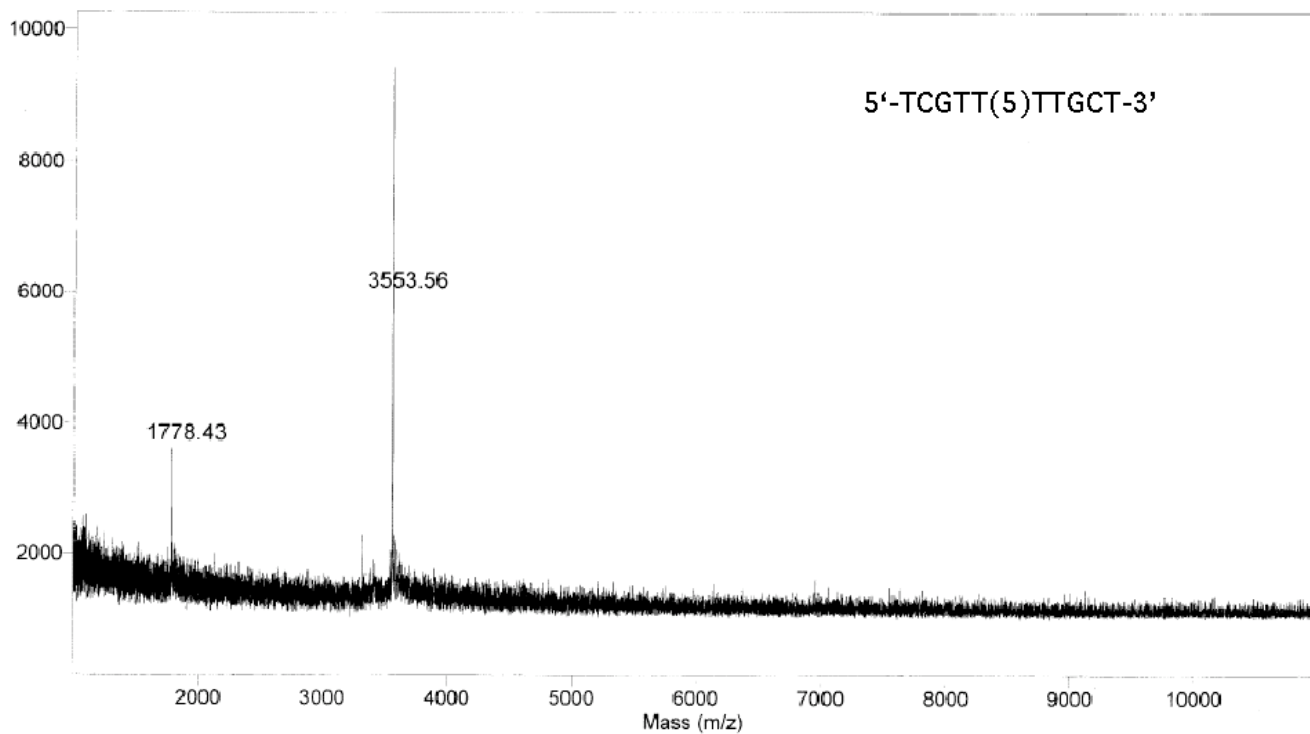

**Figure S8.** MALDI-TOF Mass spectrum of oligonucleotide **11**.

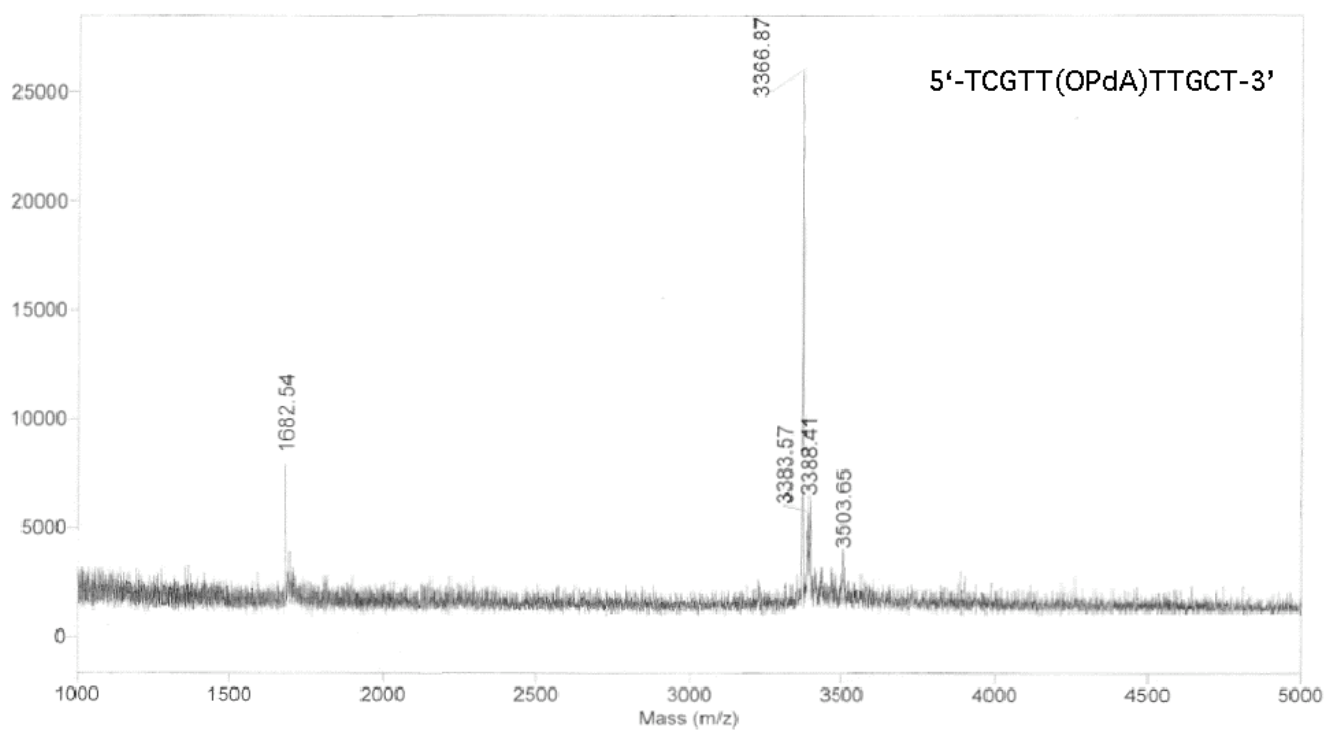

**Figure S9.** MALDI-TOF Mass spectrum of oligonucleotide **12**.

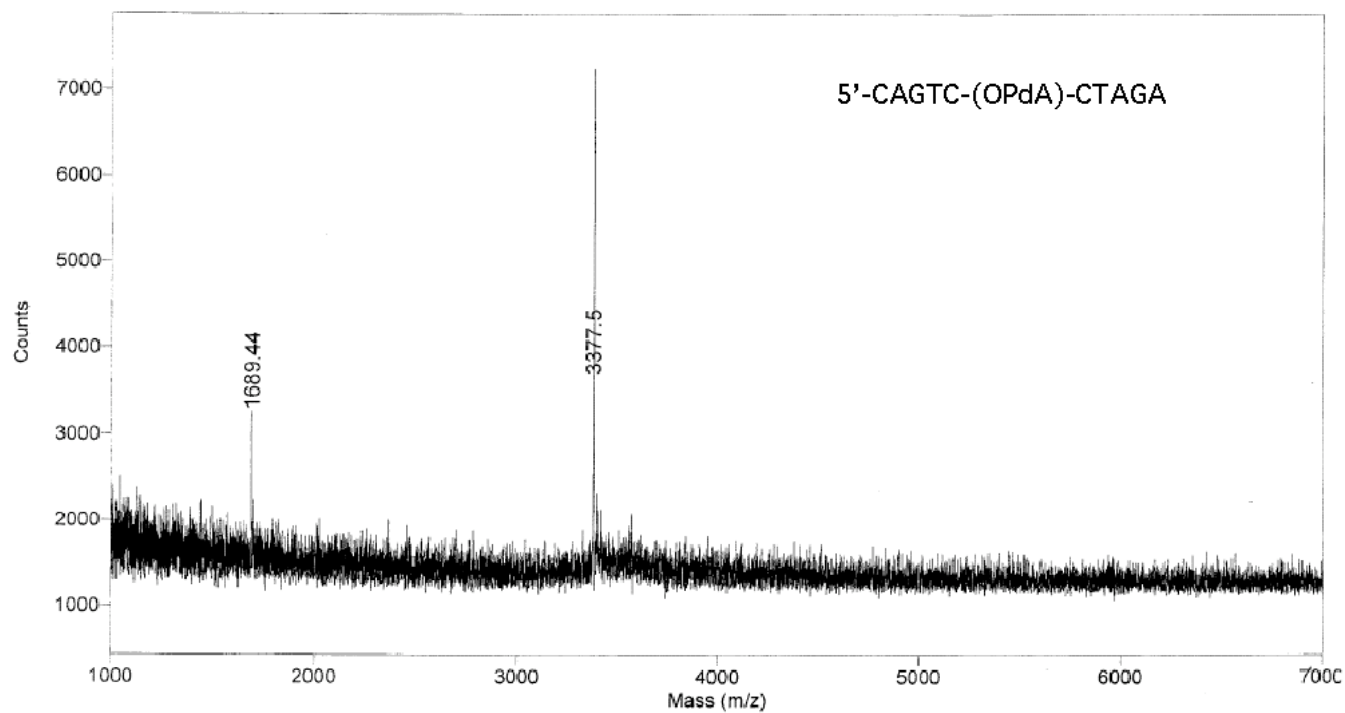

**Figure S10.** MALDI-TOF Mass spectrum of oligonucleotide **13**.

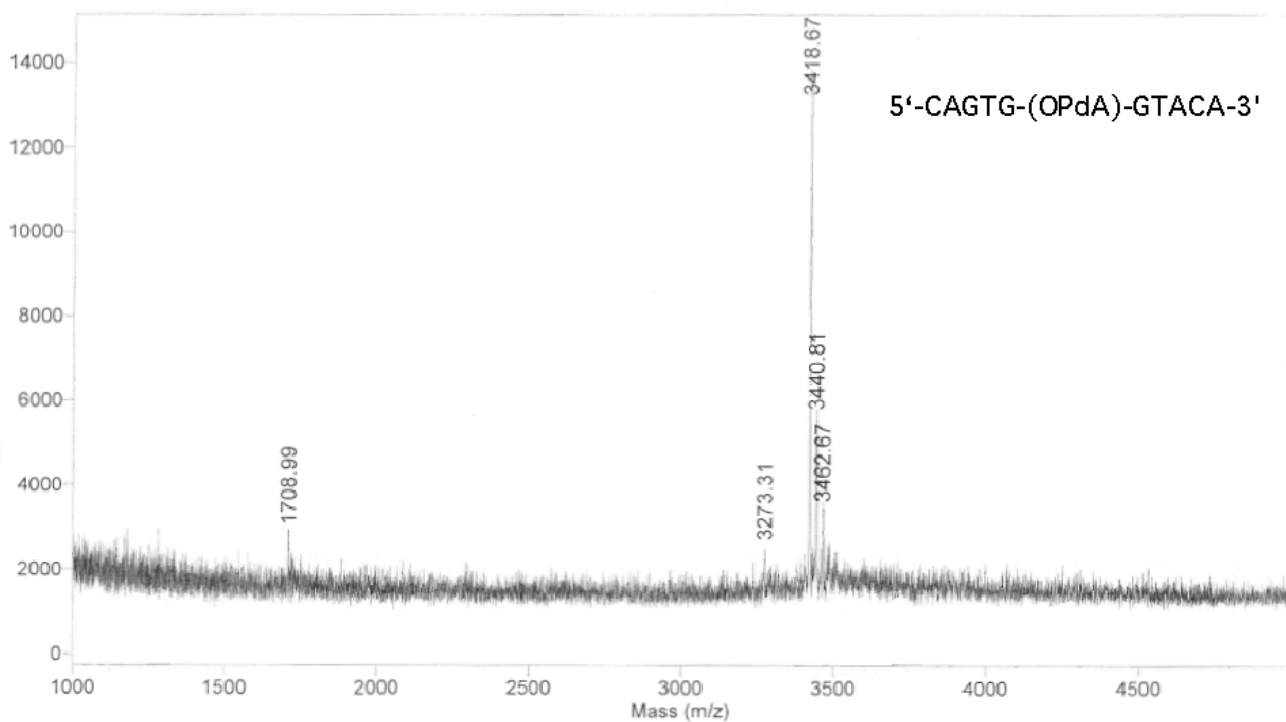

**Figure S11.** MALDI-TOF Mass spectrum of oligonucleotide **14**.

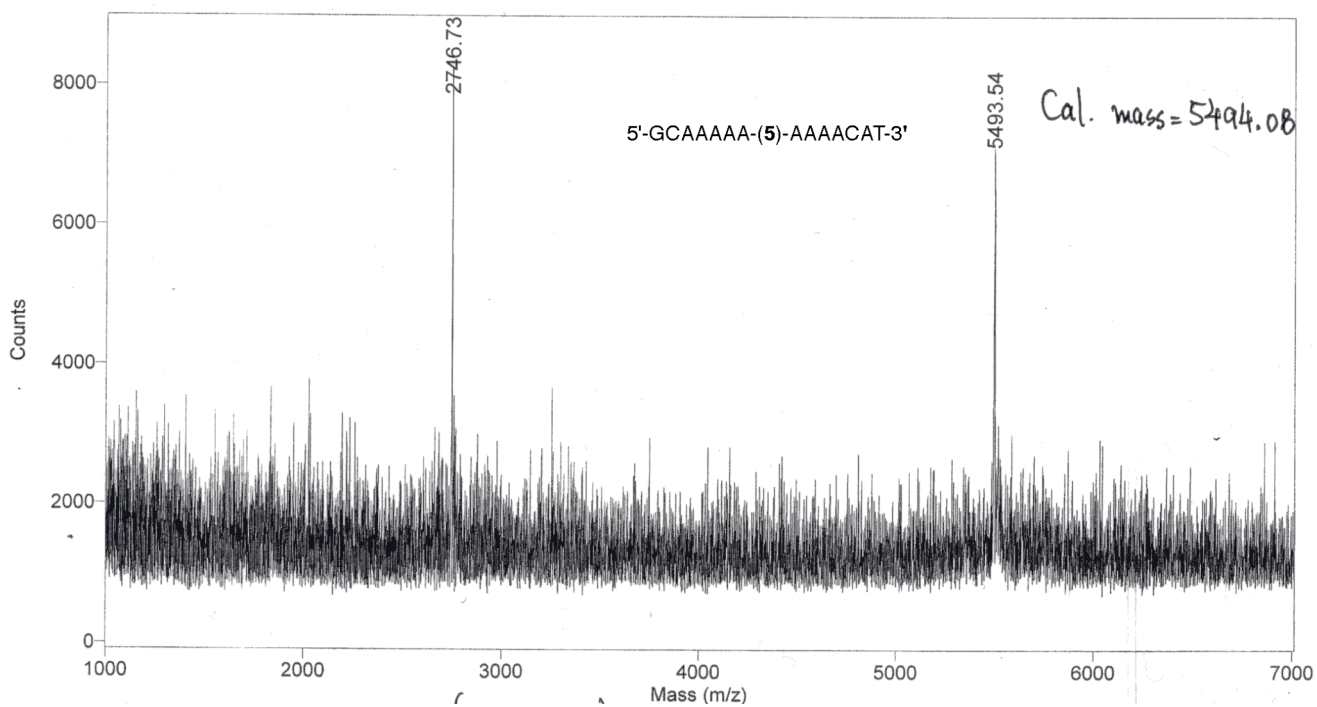

**Figure S12.** MALDI-TOF mass spectrum of oligonucleotide 5'-GCAAAAA-5-AAAACAT-3'.

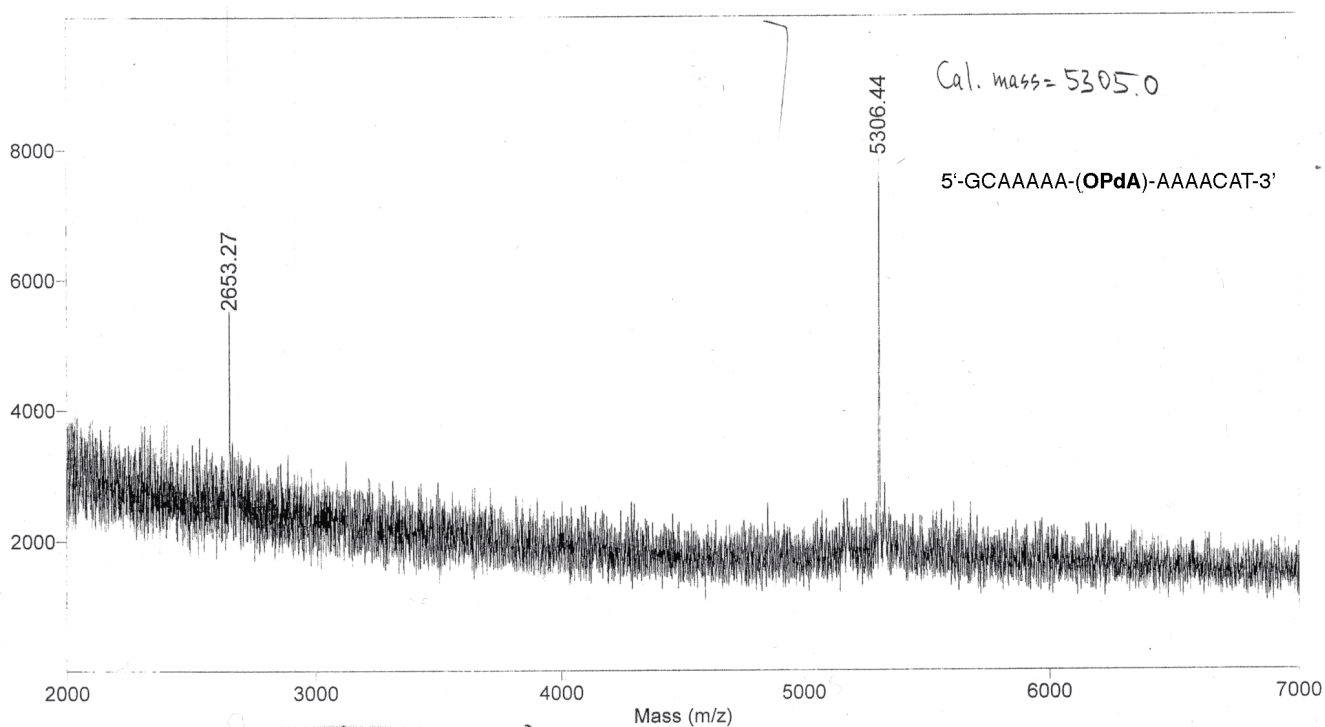

Figure S13. MALDI-TOF mass spectrum of oligonucleotide **15**.

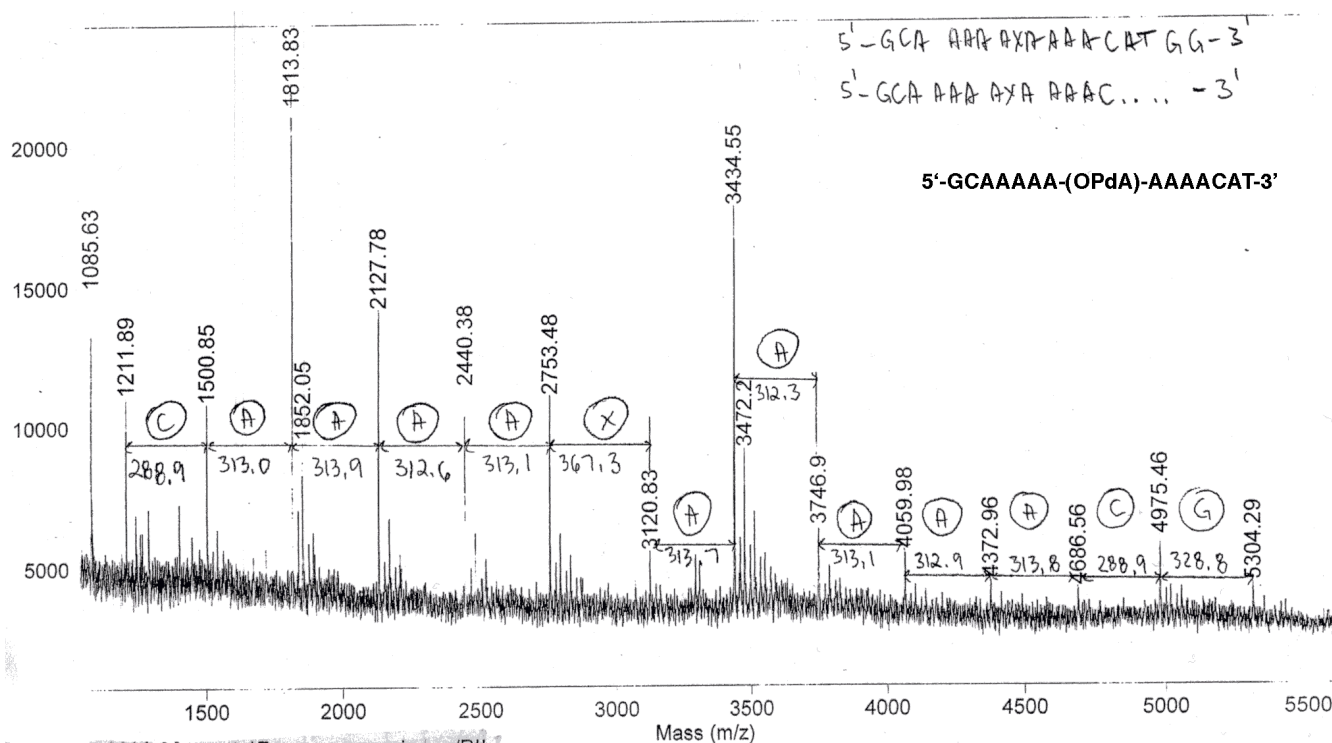

Figure S14. MALDI-TOF sequencing ladder of oligonucleotide **15** with phosphodiesterase PII



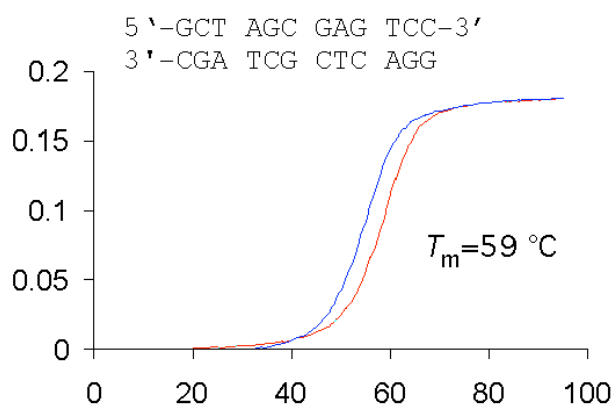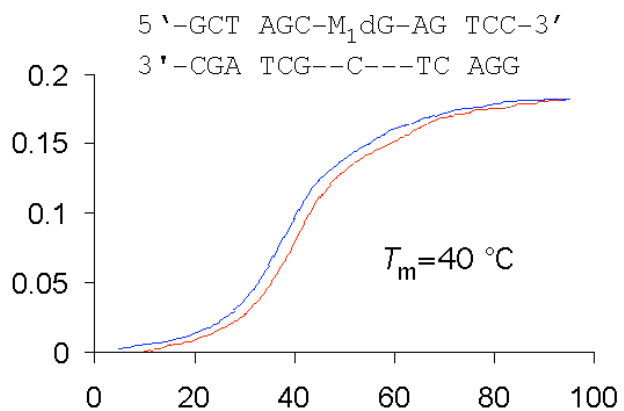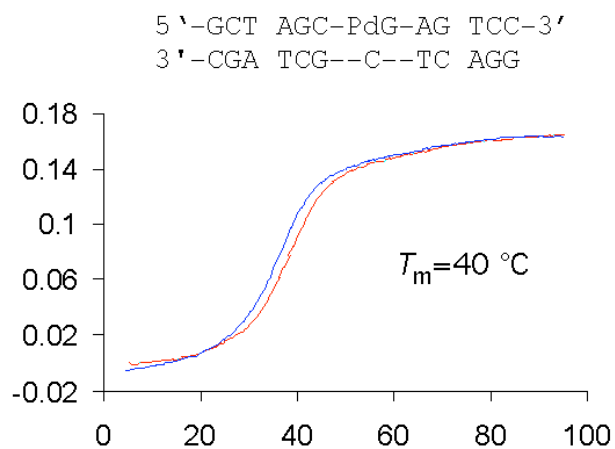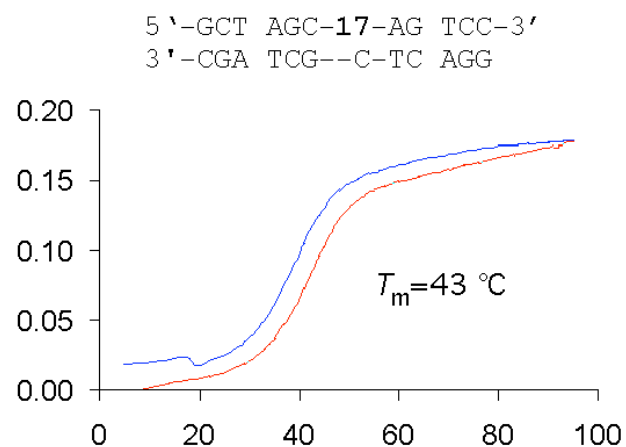

**Figure S15.**  $T_m$  curves for oligonucleotide **9** and related dG derivatives

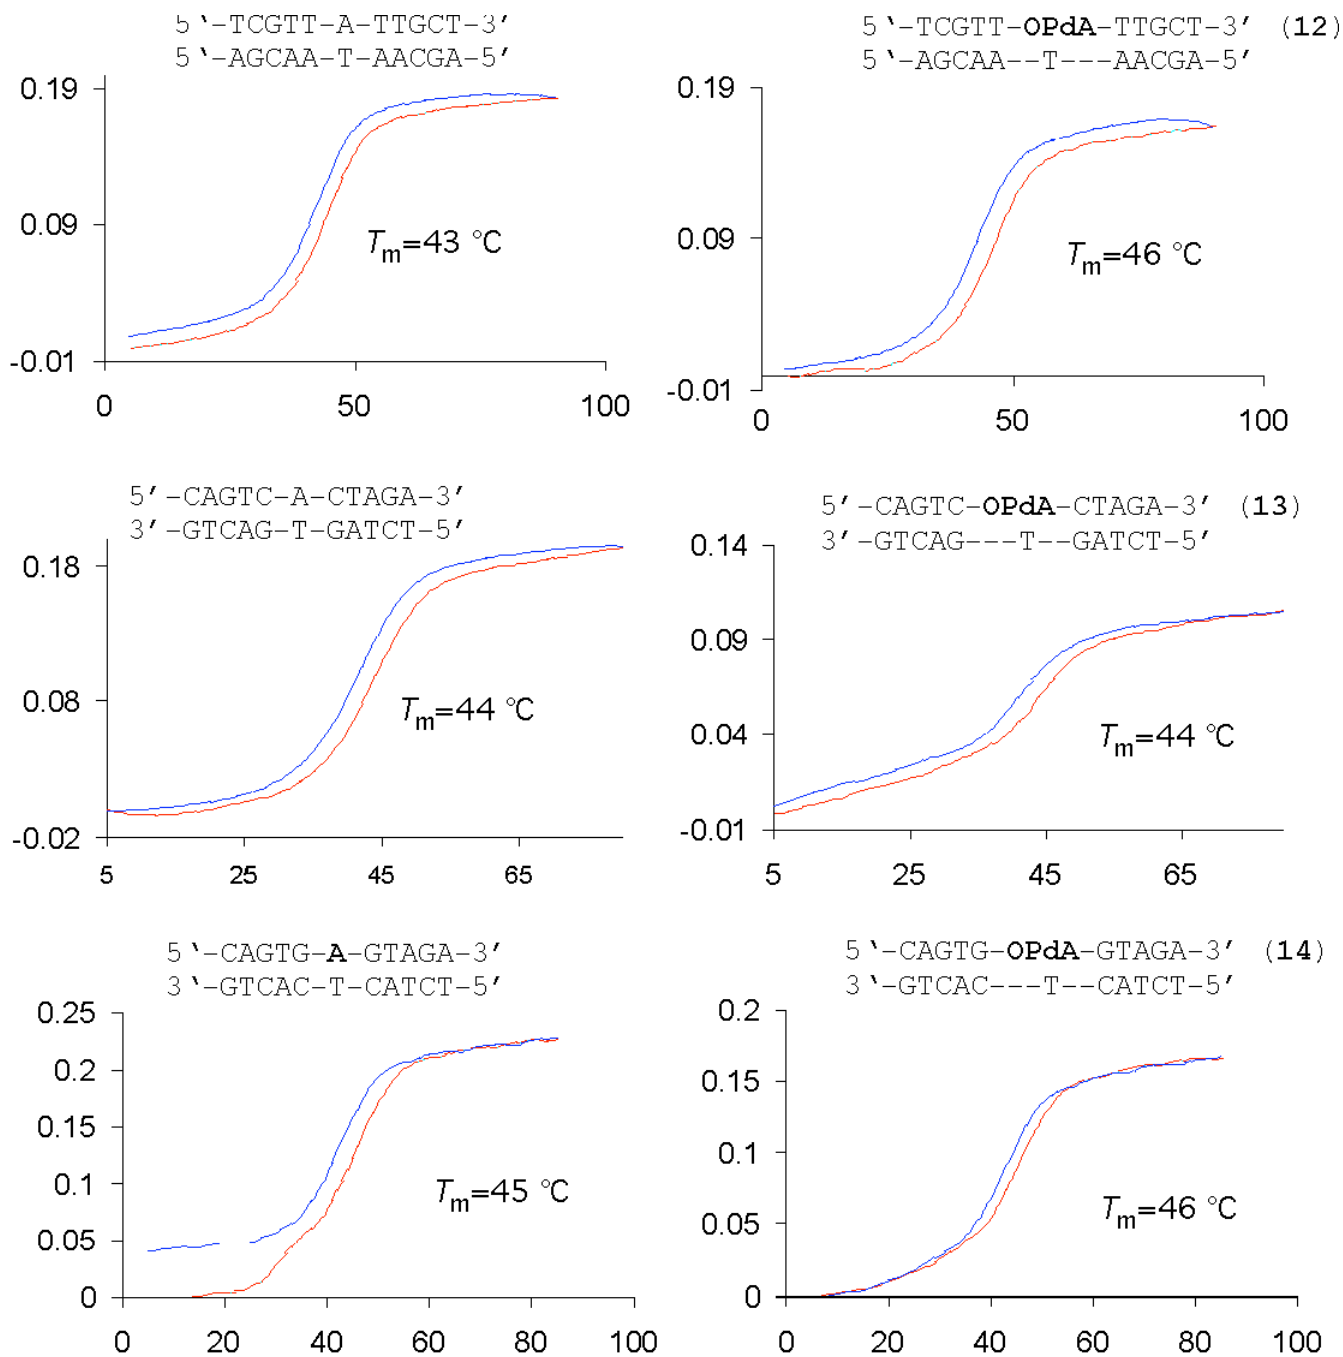

**Figure S16.**  $T_m$  curves for OPdA-containing oligonucleotides **12**, **13**, and **14**.

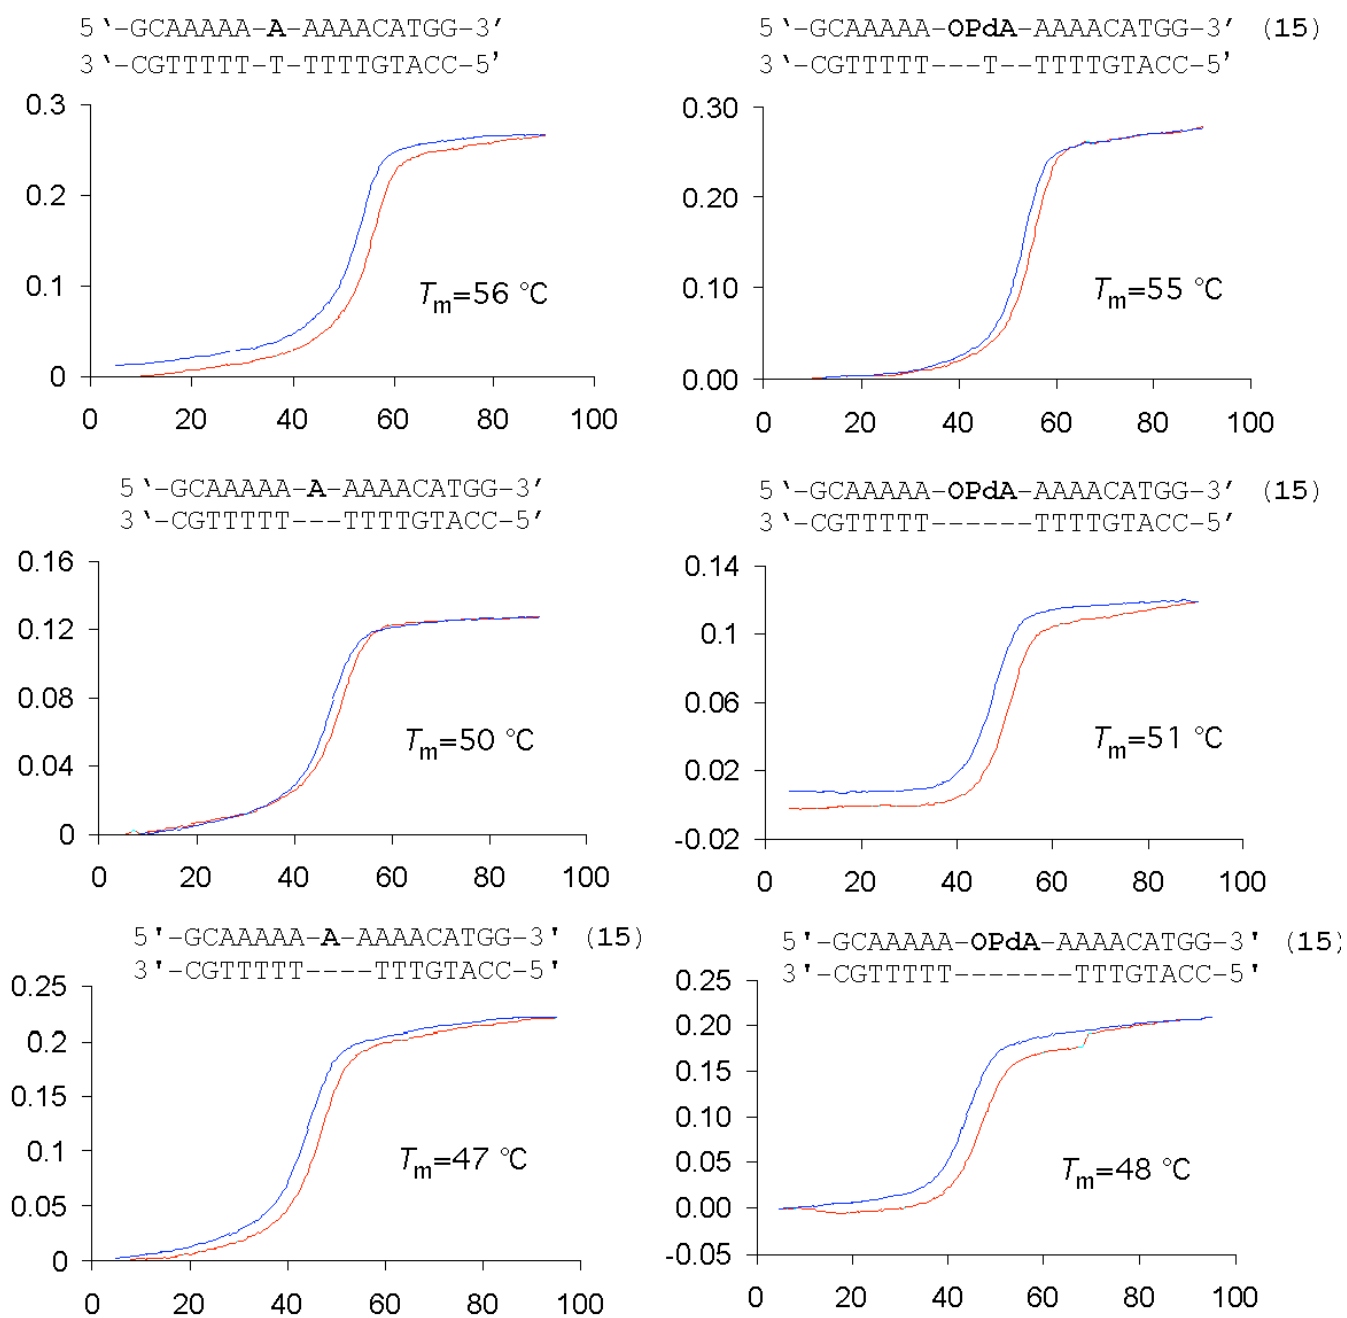

**Figure S17.**  $T_m$  curves for OPdA-containing oligonucleotides 15.
